# Supplementary material for: Reduced Cortical Thickness in the Temporal Pole, Insula, and Pars Triangularis in Patients with Panic Disorder
Source: PubMed Central journal article supplement — Yonsei Med J. 2017 Jul 31;58(5):1018–24. doi: 10.3349/ymj.2017.58.5.1018 (PMC5552629; doi:10.3349/ymj.2017.58.5.1018), 2017-07-31
Supplement: ymj-58-1018-s001.pdf [file ymj-58-1018-s001.pdf]

**(A1) Left temporal pole**

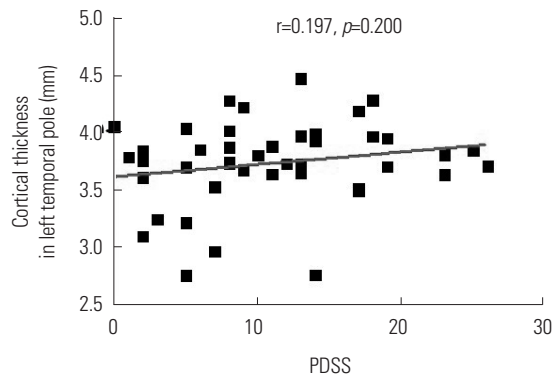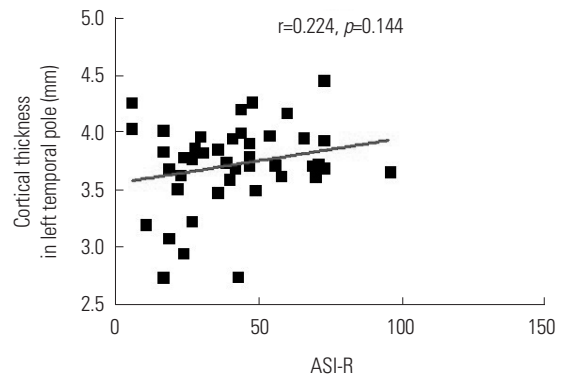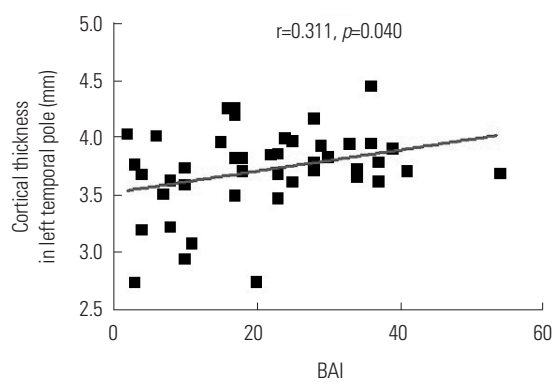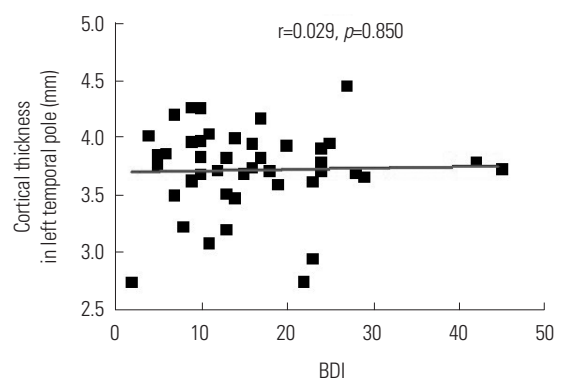

**(A2) Right temporal pole**

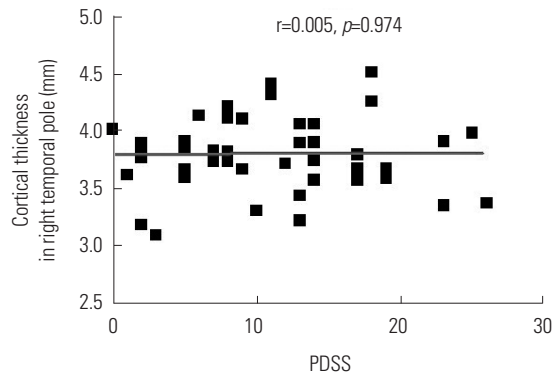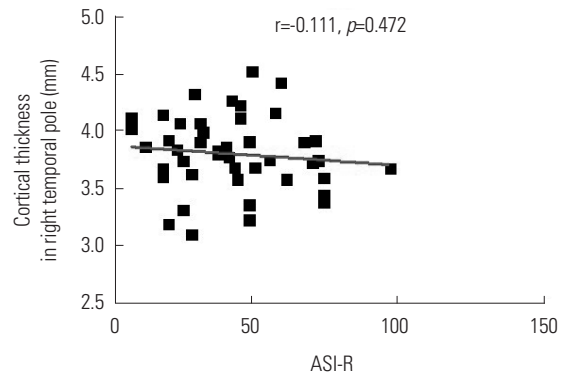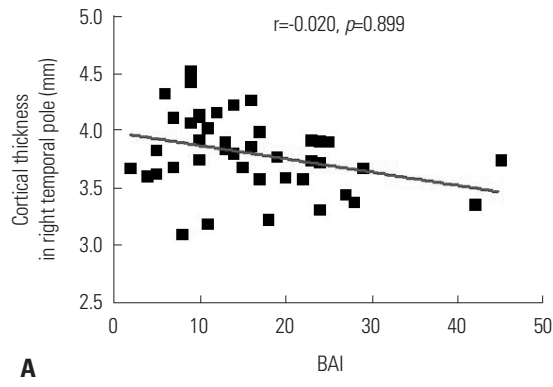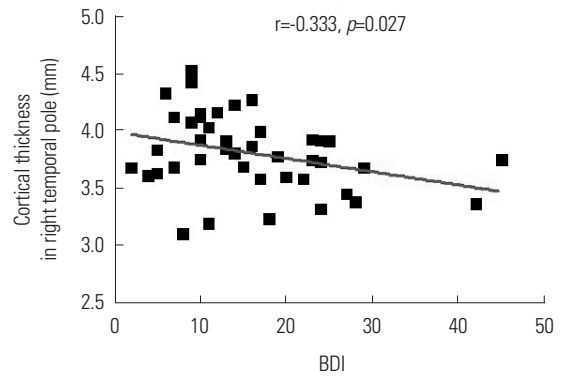

**A**

**(B1) Left insula**

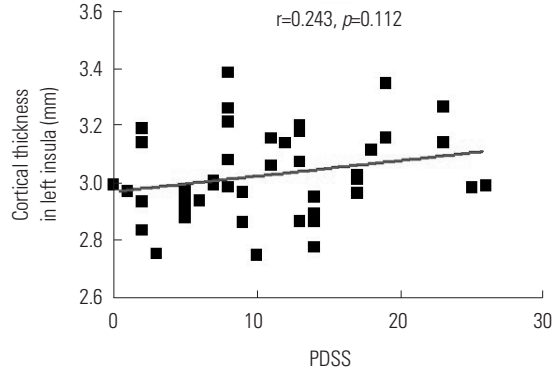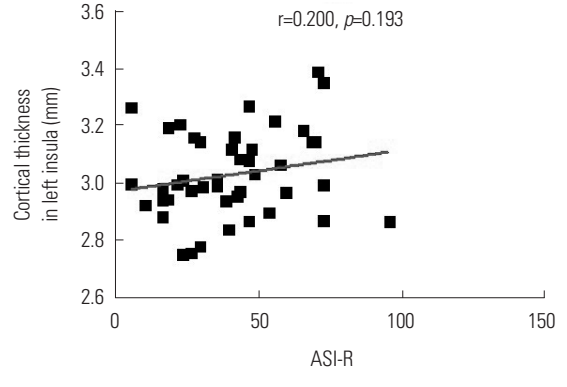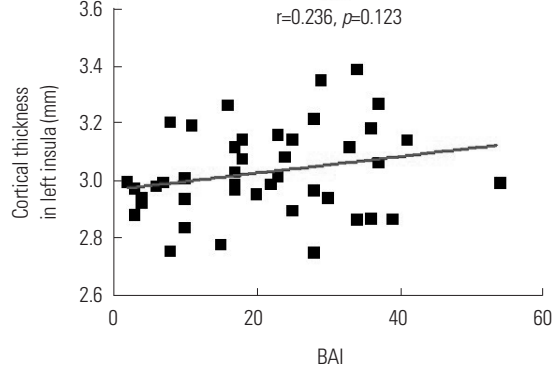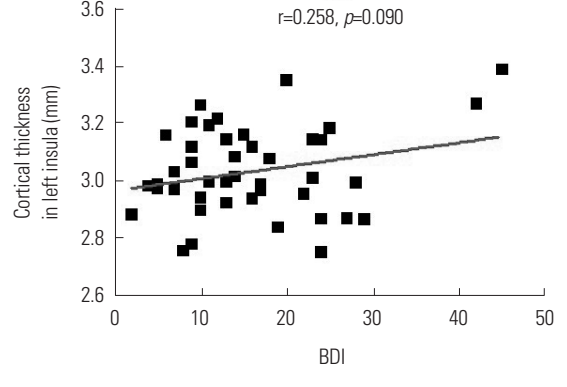

**(B2) Right insula**

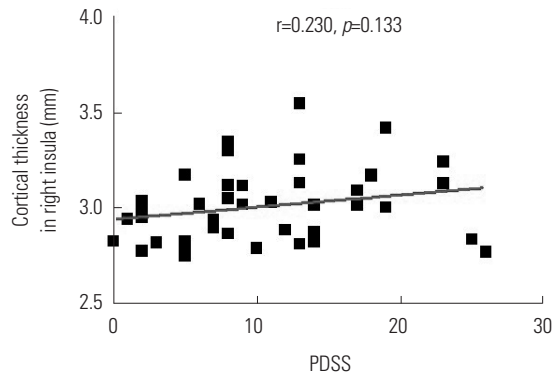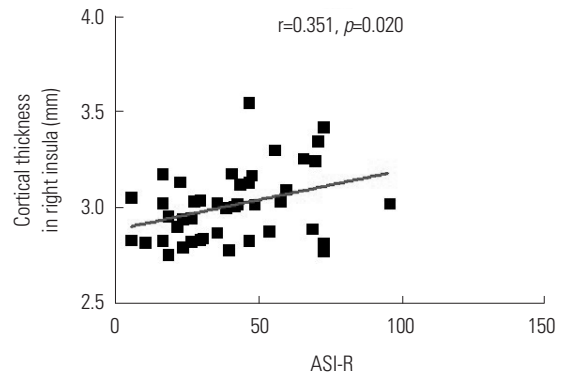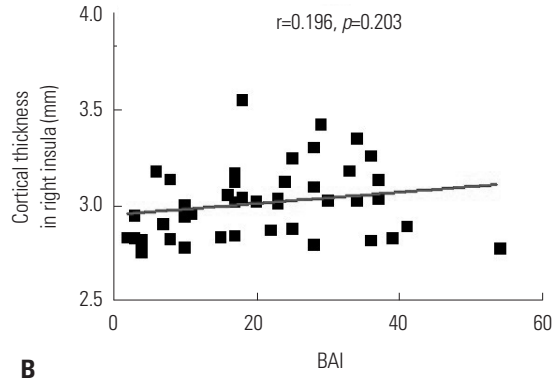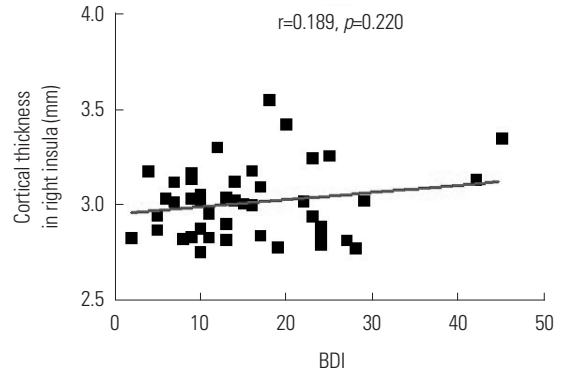

**B**

**(C1) Left pars triangularis**

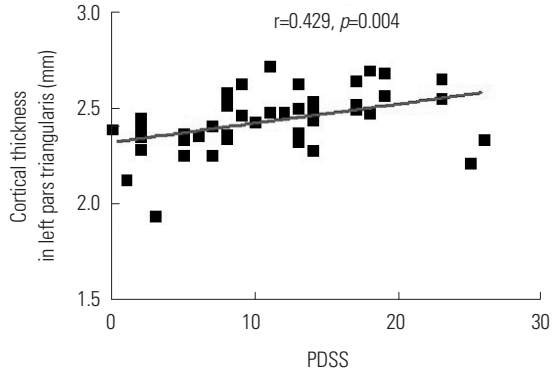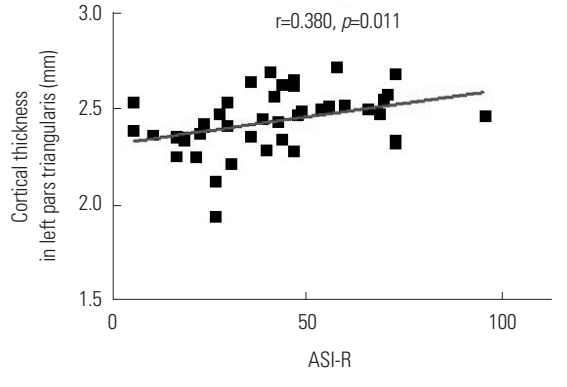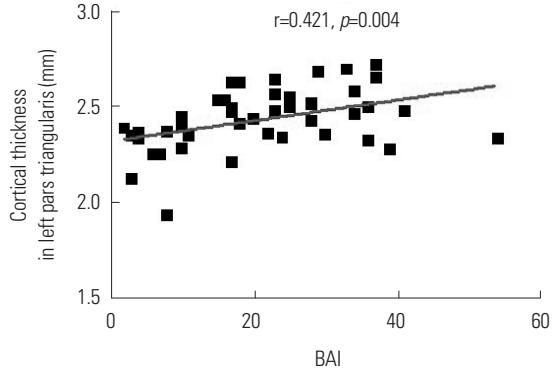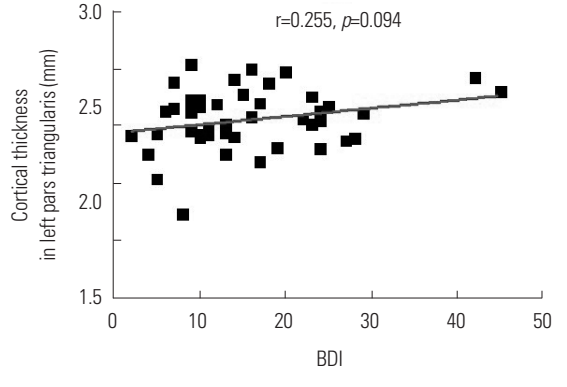

**(C2) Right pars triangularis**

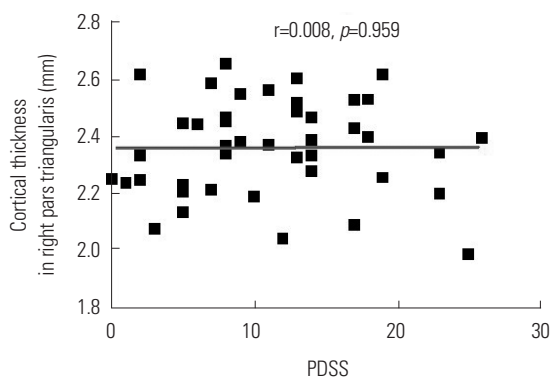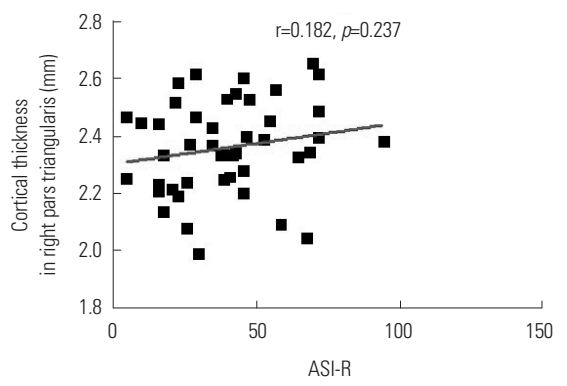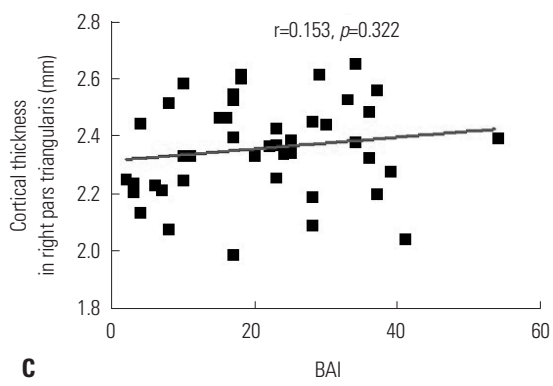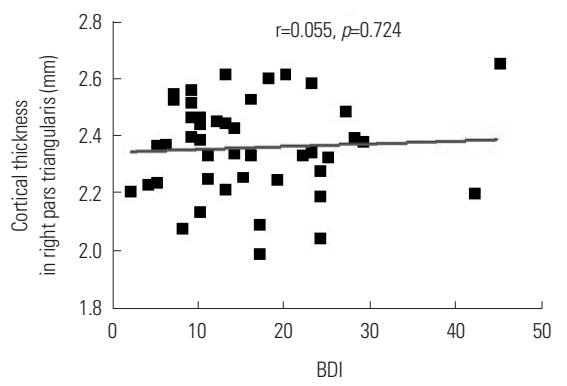

**C**

**Supplementary Fig. 1.** Scatter plots show correlations between PDSS, ASI-R, BAI, and BDI scores with cortical thickness of the temporal pole (A), insula (B), and pars triangularis (C). PDSS, Panic Disorder Severity Scale; ASI-R, Anxiety Sensitivity Inventory-Revised; BAI, Beck Anxiety Inventory; BDI, Beck Depression Inventory.
